# Supplementary material
Source: PubMed Central journal article supplement (PMC5823774)
Supplement: NIHMS933730-supplement-Methods_and_material.pdf [file NIHMS933730-supplement-Methods_and_material.pdf]

1 **ONLINE MATERIALS AND METHODS**

2  
3 **Cigarette Smoke Initiates Oxidative Stress-Induced Cellular Phenotypic Modulation Leading to**  
4 **Cerebral Aneurysm Pathogenesis**

5 Robert M. Starke, M.D., M.Sc.,<sup>1</sup> John W. Thompson, Ph.D.,<sup>1</sup> Muhammad S. Ali, M.D.,<sup>2</sup> Crissey L.  
6 Pascale, M.Sc.,<sup>3</sup> Alejandra Martinez Lege, PhD,<sup>3</sup> Dale Ding M.D.,<sup>4</sup> Nohra Chalouhi, M.D.,<sup>5</sup> David M.  
7 Hasan, M.D.,<sup>2</sup> Pascal Jabbour, M.D.,<sup>5</sup> Gary K. Owens, Ph.D.,<sup>6</sup> Michal Toborek, MD., PhD<sup>7</sup> Joshua M.  
8 Hare, M.D.,<sup>8</sup> Aaron S. Dumont, M.D.<sup>3</sup>

9  
10 <sup>1</sup>*Department of Neurological Surgery & Radiology & the University of Miami Cerebrovascular Initiative,*  
11 *University of Miami;* <sup>2</sup>*Department of Neurosurgery, University of Iowa;* <sup>3</sup>*Department of Neurological*  
12 *Surgery, Tulane University;* <sup>4</sup>*Department of Neurosurgery, University of Virginia;* <sup>5</sup>*Department of*  
13 *Neurosurgery, Thomas Jefferson University;* <sup>6</sup>*Department of Molecular Physiology & Biophysics, Robert*  
14 *M. Berne Cardiovascular Research Center, University of Virginia;* <sup>7</sup>*Department of Biochemistry and*  
15 *Molecular Biology, University of Miami,* <sup>8</sup> *Department of Cardiology and Molecular and Cellular*  
16 *Pharmacology, University of Miami*

17  
18  
19 **MATERIALS AND METHODS:**

20 This study was carried out in strict accordance with the recommendations in the Guide for the Care and  
21 Use of Laboratory Animals of the National Institutes of Health. The protocol was approved by local  
22 Committees on the Ethics of Animal Experiments. All surgery was performed under general anesthesia  
23 with Ketamine and Xylazine. All efforts were made to minimize suffering. Cerebral blood vessels (Circle  
24 of Willis) from rats were harvested for primary cell culture and for quantitative real-time polymerase  
25 chain reaction (RT-PCR), ROS production, and assessment following adenovirus promoter transfection.  
26 *In vitro* cigarette smoke extract (CSE) was carried out with cigarette smoke extract (Murty  
27 Pharmaceutical), and *in vivo* CSE was carried out within a smoking chamber (Kentucky Research  
28 cigarettes).

29  
30 **Rat Cerebral Vascular Smooth Muscle Cell Culture and CSE Exposure**

31 Cerebral blood vessels (circle of Willis) from 7 week-old rats (Sprague-Dawley) were harvested for  
32 primary cell culture as previously described<sup>1,2</sup>. Cerebral blood vessels were placed in cold Hank's  
33 Balanced Salt Solution (HBSS). The vessels were washed, connective tissue and arachnoid were  
34 removed, and were placed in enzyme solution (Collagenase II 1mg/ml, Soybean Trypsin Inhibitor  
35 1mg/ml, and Elastase 0.744 U/ml in HBSS) for 8-10 minutes. The adventitial layer was stripped. After an  
36 hour, the vessels were washed in media, plated in culture dishes in growth medium containing Dulbecco's  
37 Modified Eagle Medium/F12 media (20% FBS and 1% anti-anti) in a humidified atmosphere of 95% air  
38 and 5% CO<sub>2</sub>. Cells were weaned to 10% FBS after passage 3-5. For experiments, unless otherwise noted,  
39 cells were grown to confluence and placed in serum free media containing DMEM/F12, L-ascorbic acid

40 (200  $\mu$ M), apotransferrin (5  $\mu$ g/ml) and selenium selenite (6.25 ng/ml), in addition to L-glutamine, and  
41 anti-anti (Invitrogen) for 72 hours prior to the start of the experiment.

42 Cells were treated with CSE dissolved in HEPES buffer for 24 hours for RT-PCR and 72 hours for  
43 Western blot. The CSE dose and timing was based on our preliminary studies and was selected to  
44 approximate levels of water-soluble components of cigarette smoke and nicotine present in plasma levels  
45 of human smokers<sup>1</sup>.

46

#### 47 **Adenovirus Constructs and Infection**

48 Adenoviruses encoding the flag-tagged NOX (Ad/NOX) gene, NOX1-antisense (Ad/AS-NOX1), and  
49 empty vector control were generated using standard methods.<sup>3</sup> VSMC were infected twenty-four hours  
50 after plating, at a multiplicity of infection (MOI) of 50 for 24-48 hours; resulting in greater than 95%  
51 infection.

52

#### 53 **Transient Transfection and Luciferase Assay**

54 VSMC were transfected with a reporter plasmid (SM  $\alpha$ -actin-luc (-2555/+2813 bp), SM MHC-luc (-  
55 4220/+11600bp), or pGL3 basic plasmid) using FuGENE (Roche Diagnostics Corp.) following the  
56 manufacturer's protocol. Luciferase activity was measured with luciferase assay substrate (Promega  
57 Corporation) and the data normalized to total protein content.

58

#### 59 **Quantitative Real-Time RT-PCR**

60 Total RNA was prepared from VSMCs using a RNeasy Kit (Qiagen) following the manufacturer's  
61 instructions. Total RNA was isolated from CAs or cerebral blood vessels using an Ultra-Turrax (Sigma-  
62 Aldrich) isolation kit, and total RNA was prepared using RNeasy fibrous mini kit (Qiagen) according to  
63 manufacturer's instructions. cDNA was prepared using 0.5-1  $\mu$ g of total RNA and RT-PCR conducted  
64 using iQ SYBR Green (Bio-Rad laboratories) Results were normalized to 18S rRNA gene expression.  
65 Primer sequences are listed in the online supplemental Table 1.

66

#### 67 **Dihydroethidium In Situ Superoxide Imaging**

68 Cells were incubated with dihydroethidium (10 mmol/l; Sigma Aldrich) and imaged using fluorescence  
69 microscopy. *In vivo* specimens from mice were cut and mounted on slides and incubated with 20 mmol/l  
70 dihydroethidium and imaged using fluorescence microscopy.

71

72

#### 73 **Reactive Oxygen Species Assessment with Lucigenin-Enhanced Chemiluminescence**

74 VSMC were lysed and the lysates added to lucigenin chemiluminescence (250  $\mu$ M). Luminescence was  
75 measured every 15s for 3 minutes by a luminometer. The results are displayed as counts per mg of  
76 protein (percentage of control).

77

### 78 **Cerebral Aneurysm Induction**

79 CAs were induced in 8- to 10-week-old male NOX p47phox gene null (p47phox *-/-*) mice or wild type  
80 controls (Jackson Laboratory, Bar Harbor, ME) using previously described methods,<sup>4,7</sup> with alterations  
81 described below.

82

83 To induce hypertension, mice underwent a unilateral nephrectomy, followed by implantation of a  
84 deoxycorticosterone acetate (DOCA) pellet (Innovative Research of America) one week later.<sup>7,8</sup> On the  
85 same day as DOCA pellet implantation, animals were started on drinking water containing 1% NaCl<sup>4,6,8</sup>  
86 and 0.12% beta-aminopropionitrile (BAPN) to reduce collagen cross-linking.<sup>9</sup> To induce aneurysm  
87 formation on the same day as DOCA pellet implantation, mice underwent a single stereotactic injection  
88 of elastase (Sigma Aldrich; 3.5 mU, 17.5 mU, and 35 mU) into the cerebrospinal fluid of the right basal  
89 cistern.<sup>4,6</sup> Sham control mice received a single stereotactic injection of vehicle (PBS). Animals were  
90 randomly assigned to the sham or CA groups.

91

92 Blinded daily neurological examination was performed as previously described.<sup>5,7,10-12</sup> All asymptomatic  
93 mice were euthanized 28 days after CA induction. To visualize the cerebral arteries as well as to assess  
94 for CA formation and SAH, mice were transcardial perfused with a gelatin - blue dye mixture. An  
95 aneurysm was defined as a localized outward bulging of the vascular wall whose diameter was greater  
96 than 1.5 times the parent artery diameter.<sup>4,5</sup>

97

### 98 **Treatment with Apocynin**

99 Mice were administered the antioxidant/NADPH oxidase inhibitor apocynin (acetovanillone, Sigma  
100 Aldrich), by dissolved in their drinking water (100 mg/kg/day). Controls received water only. Dosing  
101 was based on preliminary studies<sup>1,2</sup> and prior experiments.<sup>13</sup> Apocynin treatment was started three days  
102 prior to elastase injection and continued for 28 days.

103

### 104 **Cigarette Smoke Exposure *In Vivo***

105 CS exposure was started 7 days prior to nephrectomy. The mice were repeatedly exposed to CS for a total  
106 of 200 minutes (Kentucky Research cigarettes (3r4f) each day. The CS exposure condition was evaluated  
107 weekly and CO<sub>2</sub> concentration inside the chamber was measured using gas chromatography. Levels of  
108 CO<sub>2</sub> were never above 1400 ppm; levels of O<sub>2</sub> were never below 16%; and levels of carbon monoxide  
109 were never above 5%. Average CO<sub>2</sub> concentration inside the chamber was 750 ± 50 ppm at the time  
110 point of burning for 15 min and 600 ± 50 ppm when the smoke was diffusing for another 25 min

111

112

### 113 **Application of CSE to Rat Carotid Artery**

114 *In vivo* experiments were carried out following application of pluronic gel (Sigma-Aldrich) containing  
115 CSE to the adventitial surface of rat carotid arteries, a validated model of carotid atherosclerosis and  
116 cerebrovascular disease<sup>1,14-16</sup>. Anesthesia was induced and maintained using Isoflurane. 100 µl of ice-  
117 cold F-127 Pluronic Gel (Sigma-Aldrich) containing CSE at 0.8 mg/ml (n=6) and vehicle (n=6) was  
118 applied to the adventitial surface of rat carotid arteries for 6–8 hrs for NOX and 12 hours for  
119 differentiation and inflammatory marker genes. Vessels were extracted, homogenized using Ultra-Turrax  
120 (Sigma-Aldrich), and total RNA was extracted using RNeasy fibrous mini kit (Qiagen) using  
121 manufacturer's protocol. Results were normalized to 18S rRNA gene expression and compared to non-  
122 treated vessels.

123

### 124 **Statistical Analysis**

125 With an alpha of 0.05 and a power of 80% and based on preliminary experimental studies on the  
126 incidence of CA formation according to various elastase doses, approximately 25 animals would be  
127 required in each cohort to detect differences in overall CA formation with an elastase dose of 35 mU and  
128 30 animals with an elastase doses of 3.5 mU.

129

130 All experiments were performed with a minimum of triplicate samples and were conducted in 3 to 6  
131 independent experiments unless otherwise indicated. Data are presented as mean and range for  
132 continuous variables, and as frequency for categorical variables. Analysis was carried out using Chi-  
133 square, Fisher's exact, Wilcoxon rank sum, and Kruskal-Wallis tests as appropriate. Secondary  
134 assessment of risk of rupture was carried out by Kaplan-Meier survival analysis with Cox regression  
135 analysis to assess hazard ratios (HR). Error bars represent standard error of the mean (SEM). Statistical  
136 significance was considered defined as  $P < 0.05$ .

137

138

139

140

141

142

143

144

145

146

147

148

149 **References**

150

- 151 1. Starke RM, Ali MS, Jabbour PM, et al. Cigarette smoke modulates vascular smooth muscle  
152 phenotype: implications for carotid and cerebrovascular disease. *PLoS one*. 2013; 8 8:e71954.
- 153 2. Ali MS, Starke RM, Jabbour PM, et al. TNF-alpha induces phenotypic modulation in cerebral  
154 vascular smooth muscle cells: implications for cerebral aneurysm pathology. *Journal of cerebral  
155 blood flow and metabolism : official journal of the International Society of Cerebral Blood Flow  
156 and Metabolism*. 2013; 33 10:1564-1573.
- 157 3. Ooboshi H, Chu Y, Rios CD, Faraci FM, Davidson BL, Heistad DD. Altered vascular function after  
158 adenovirus-mediated overexpression of endothelial nitric oxide synthase. *Am J Physiol*. 1997;  
159 273 1 Pt 2:H265-270.
- 160 4. Nuki Y, Tsou TL, Kurihara C, Kanematsu M, Kanematsu Y, Hashimoto T. Elastase-induced  
161 intracranial aneurysms in hypertensive mice. *Hypertension*. 2009; 54 6:1337-1344.
- 162 5. Makino H, Tada Y, Wada K, et al. Pharmacological stabilization of intracranial aneurysms in mice:  
163 a feasibility study. *Stroke*. 2012; 43 9:2450-2456.
- 164 6. Kanematsu Y, Kanematsu M, Kurihara C, et al. Critical roles of macrophages in the formation of  
165 intracranial aneurysm. *Stroke*. 2010; 42 1:173-178.
- 166 7. Starke RM, Chalouhi N, Jabbour PM, et al. Critical role of TNF-alpha in cerebral aneurysm  
167 formation and progression to rupture. *J Neuroinflammation*. 2014; 11 1:77.
- 168 8. Weiss D, Taylor WR. Deoxycorticosterone acetate salt hypertension in apolipoprotein E-/- mice  
169 results in accelerated atherosclerosis: the role of angiotensin II. *Hypertension*. 2008; 51 2:218-  
170 224.
- 171 9. Nagata I, Handa H, Hashimoto N, Hazama F. Experimentally induced cerebral aneurysms in rats:  
172 Part VI. Hypertension. *Surg Neurol*. 1980; 14 6:477-479.
- 173 10. Huang Z, Huang PL, Panahian N, Dalkara T, Fishman MC, Moskowitz MA. Effects of cerebral  
174 ischemia in mice deficient in neuronal nitric oxide synthase. *Science*. 1994; 265 5180:1883-1885.
- 175 11. Jeon H, Ai J, Sabri M, et al. Neurological and neurobehavioral assessment of experimental  
176 subarachnoid hemorrhage. *BMC Neurosci*. 2009; 10:103.
- 177 12. Yang G, Chan PH, Chen J, et al. Human copper-zinc superoxide dismutase transgenic mice are  
178 highly resistant to reperfusion injury after focal cerebral ischemia. *Stroke*. 1994; 25 1:165-170.
- 179 13. Xiong W, Mactaggart J, Knispel R, et al. Inhibition of reactive oxygen species attenuates  
180 aneurysm formation in a murine model. *Atherosclerosis*. 2009; 202 1:128-134.
- 181 14. Pidkovka NA, Cherepanova OA, Yoshida T, et al. Oxidized phospholipids induce phenotypic  
182 switching of vascular smooth muscle cells in vivo and in vitro. *Circulation research*. 2007; 101  
183 8:792-801.
- 184 15. Isakson BE, Kronke G, Kadl A, Leitinger N, Duling BR. Oxidized phospholipids alter vascular  
185 connexin expression, phosphorylation, and heterocellular communication. *Arteriosclerosis,  
186 thrombosis, and vascular biology*. 2006; 26 10:2216-2221.
- 187 16. Furnkranz A, Schober A, Bochkov VN, et al. Oxidized phospholipids trigger atherogenic  
188 inflammation in murine arteries. *Arteriosclerosis, thrombosis, and vascular biology*. 2005; 25  
189 3:633-638.

190
