# Supplementary material
Source: PubMed Central journal article supplement (PMC5823774)

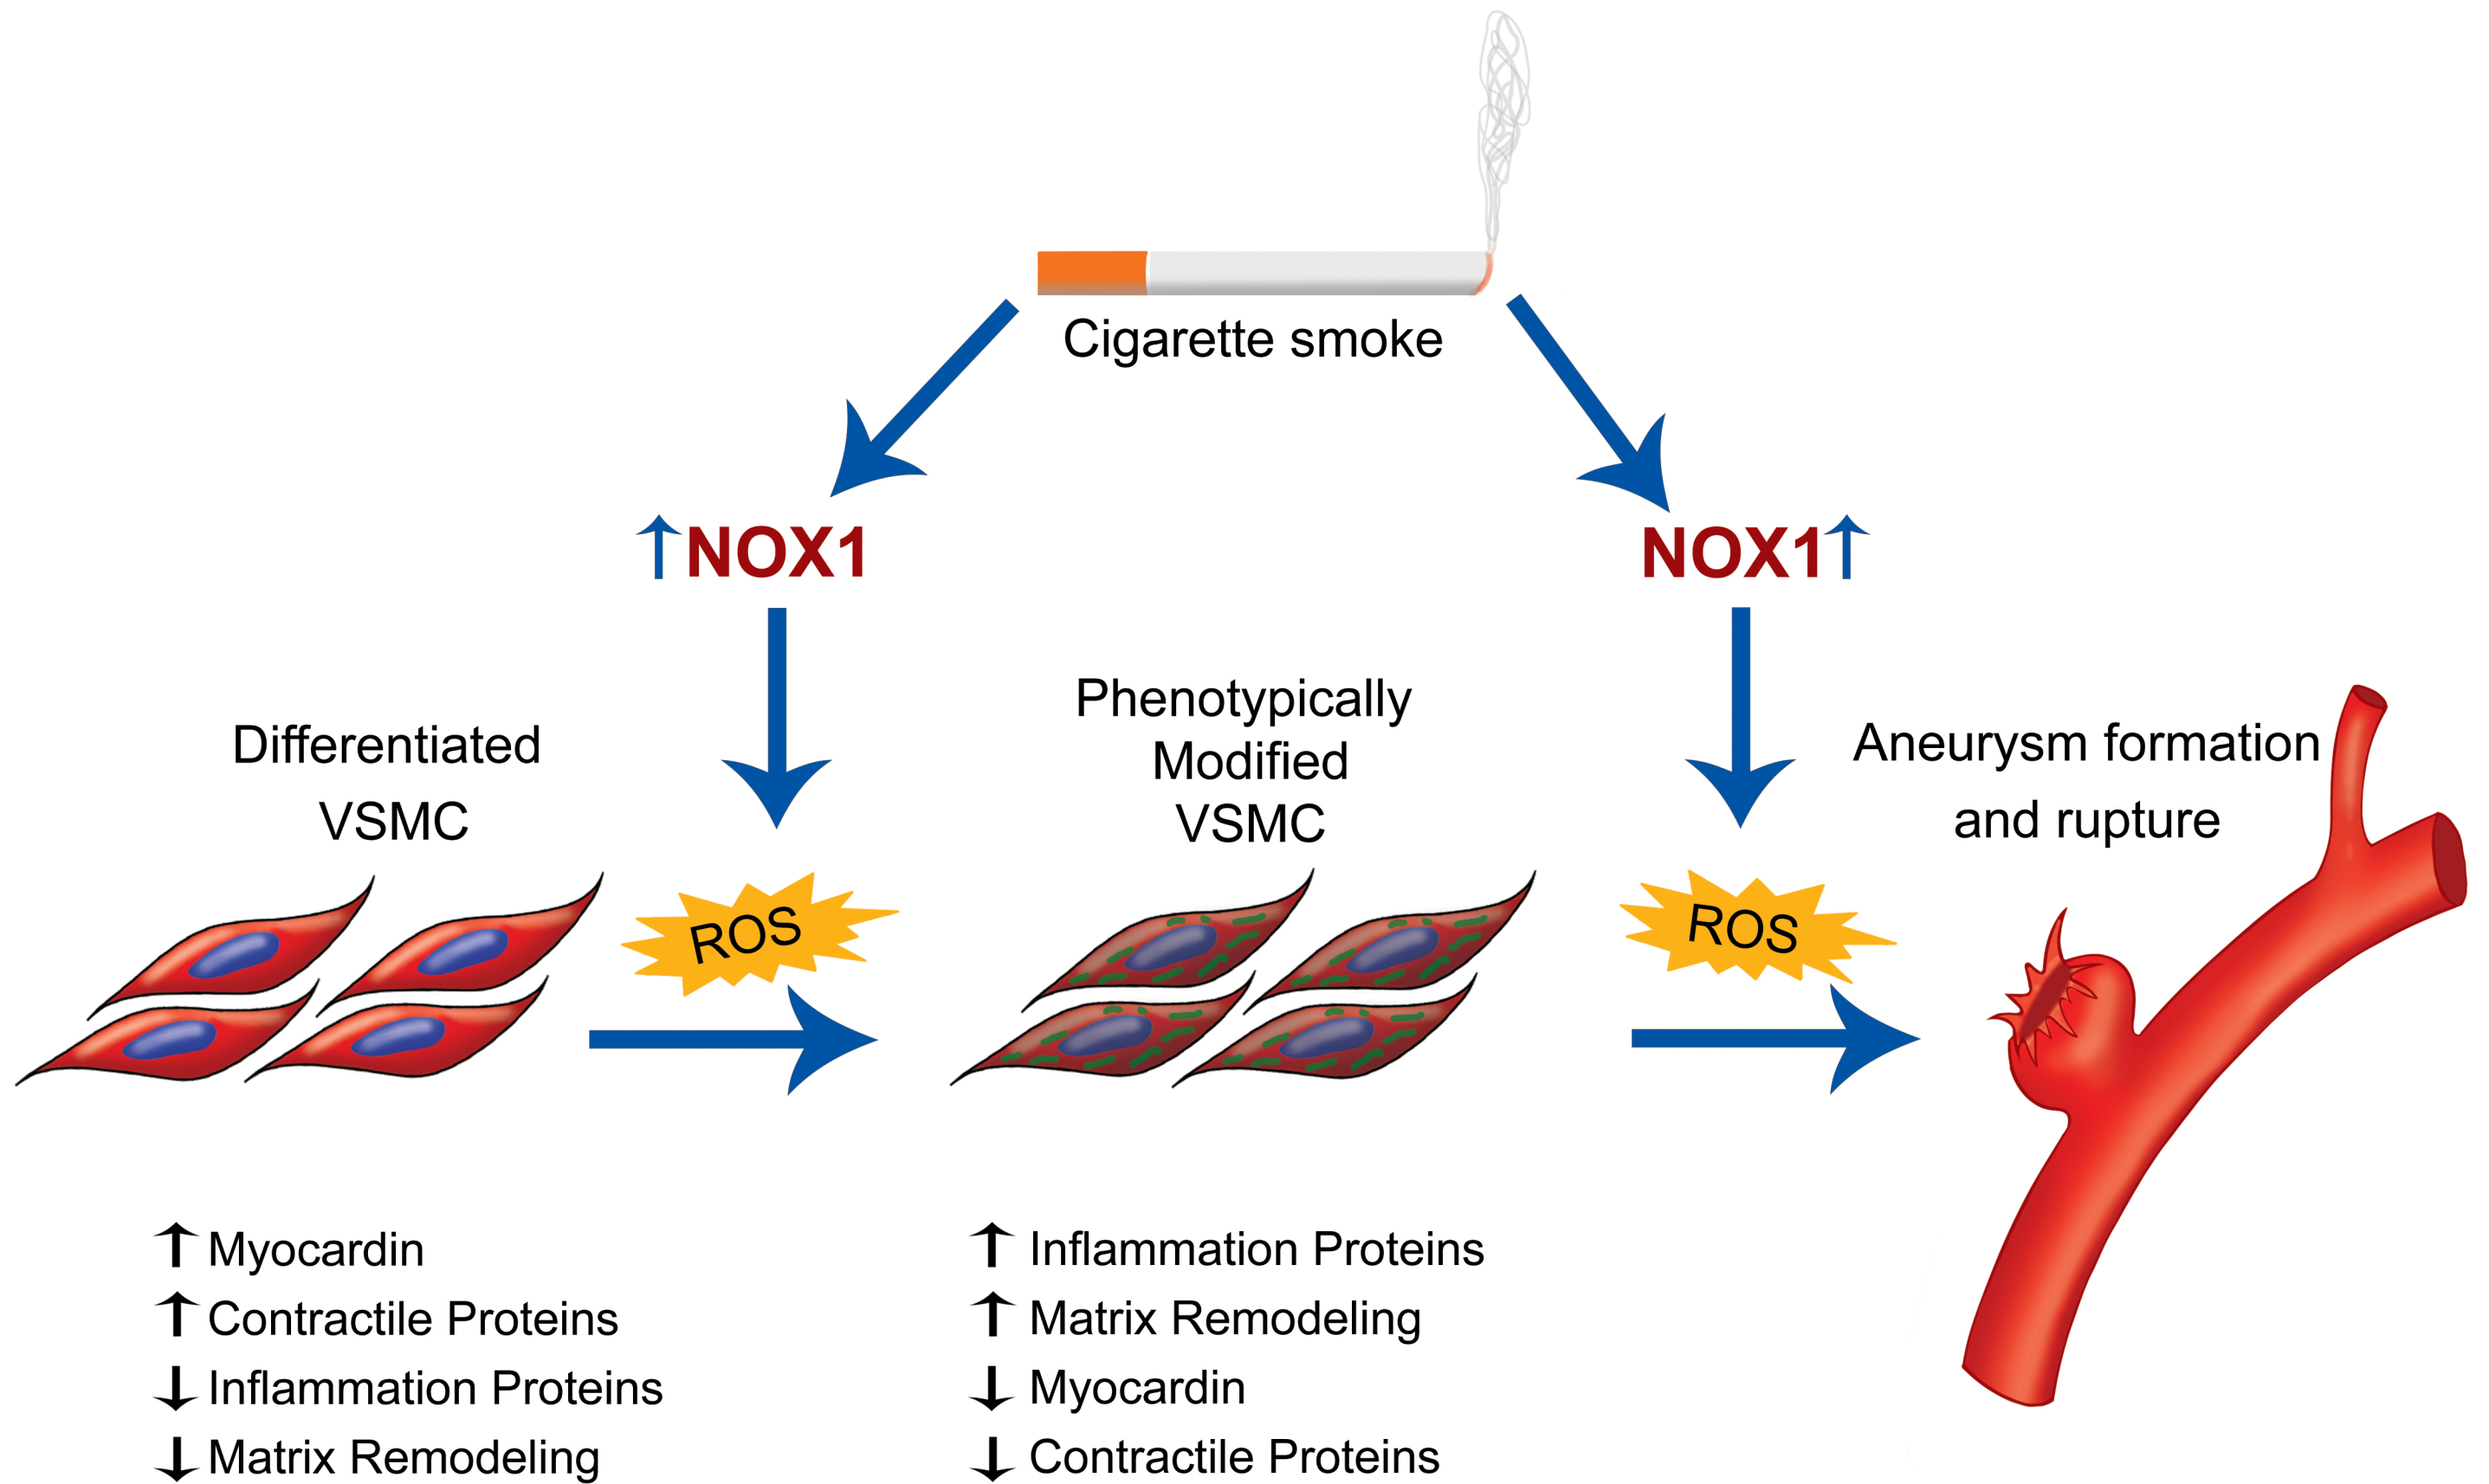

Supplement: NIHMS933730-supplement-Graphic_Abstract.pdf [file NIHMS933730-supplement-Graphic_Abstract.pdf]
